# Supplementary material for: Trehalose and tardigrade CAHS proteins work synergistically to promote desiccation tolerance
Source: PubMed Central journal article supplement (PMC9526748; doi:10.1038/s42003-022-04015-2), 2022-10-01
Supplement: 42003_2022_4015_MOESM3_ESM.pdf [file 42003_2022_4015_MOESM3_ESM.pdf]

## Description of Additional Supplementary Files

**File name:** Data S1.zip

**Description:** File containing all source data for graphs and other analysis.

**File name:** Data S2.zip

**Description:** File containing all code used in this project.
